# Supplementary material
Source: ML conference proceedings conference paper supplement (https://openreview.net/forum?id=BoRmf8wDZ7)
Supplement: supplementary_material [file attachment]

## A TRAINING DETAILS

Here we provide configurations used for training 5 and finetuning 6 our models. For pre-training, we follow a similar recipe as in MAE (He et al., 2022). For linear probing we use AdamW instead of LARS (You et al., 2017) as in MAE (He et al., 2022).

| Config                 | Value                                    |
|------------------------|------------------------------------------|
| optimizer              | AdamW (Loshchilov & Hutter, 2017)        |
| base learning rate     | 1e-4                                     |
| minimum absolute lr    | 0.0                                      |
| weight decay           | 0.05                                     |
| optimizer momentum     | $\beta_1 = 0.9, \beta_2 = 0.95$          |
| batch size             | 4096                                     |
| learning rate schedule | cosine decay (Loshchilov & Hutter, 2017) |
| warmup epochs          | 20                                       |
| training epochs        | 400                                      |
| augmentation           | RandAug (9, 0.5)                         |
| label smoothing        | 0.1                                      |
| mixup                  | 0.0                                      |
| cutmix                 | 0.0                                      |
| drop path              | 0                                        |
| layer decay            | 1.0                                      |

Table 5: **Pre-training recipe for GMAE.**

| Config                 | Value                             |
|------------------------|-----------------------------------|
| optimizer              | AdamW (Loshchilov & Hutter, 2017) |
| base learning rate     | 1e-4                              |
| minimum absolute lr    | 0.0                               |
| weight decay           | 0.01                              |
| optimizer momentum     | $\beta_1 = 0.9, \beta_2 = 0.999$  |
| batch size             | 4096                              |
| learning rate schedule | linear decay                      |
| warmup epochs          | 10                                |
| training epochs        | 90                                |
| augmentation           | BasicAug                          |
| label smoothing        | 0.1                               |
| mixup                  | 0.8                               |
| cutmix                 | 0.5                               |
| drop path              | 0.2                               |
| layer decay            | 0.8                               |

Table 6: **Fine tuning recipe GMAE.**

## A.1 MORE SAMPLES

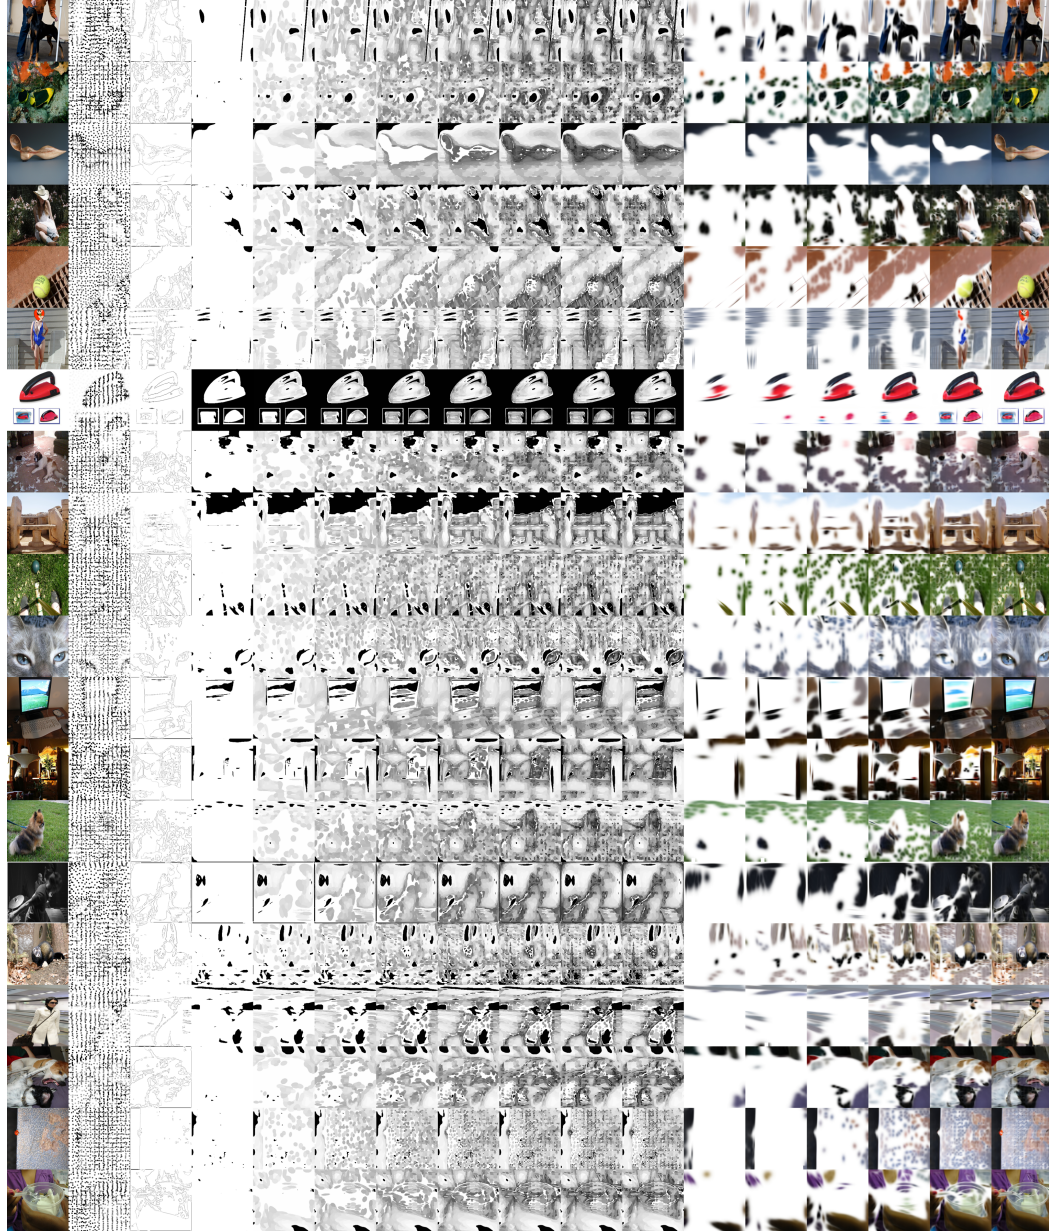

Figure 12: **Unfiltered Samples:** We show more samples from ImageNet-1K, which RGB, XY positions of Gaussians, layering of Gaussians, and RGB layering.

## A.2 RESIDUAL GAUSSIANS

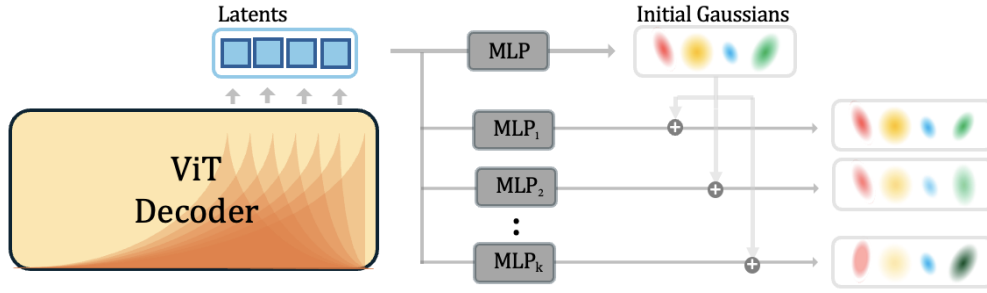

**Figure 13: Learning Residual Gaussians:** After we pretrained the model on  $N$  number of Gaussians, we increase the total number of Gaussians by learning  $k$  different small changes to the initial Gaussians. We learn  $k$  mlp layers, which learns a small changes to the initial Gaussians. We initialize  $k$  mlp-layers with zero weights. Finally all Gaussians from each mlp head is is combined to get a total of  $k \times N$  Gaussians.
